# Supplementary material for: Highly effective organic light-emitting diodes containing thermally activated delayed fluorescence emitters with horizontal molecular orientation
Source: Royal Society of Chemistry journal article supplement (doi:10.1039/d0ra07865d), 2020-01-01
Supplement: d0ra07865d1.pdf [file d0ra07865d1.pdf]

## Electronic Supplementary Information

### Highly Effective Organic Light-Emitting Diodes Containing Thermally Activated Delayed Fluorescence Emitters with Horizontal Molecular Orientation

*Chan Hee Lee<sup>a</sup>, Shin Hyung Choi<sup>a</sup>, Sung Joon Oh<sup>a</sup>, Jun Hyeon Lee<sup>a</sup>, Jae Won Shim<sup>b</sup>, Chihaya Adachi<sup>c,d</sup> and Sae Youn Lee<sup>a,\*</sup>*

<sup>a</sup>*Department of Energy and Materials Engineering, Dongguk University, Seoul, 04620, Republic of Korea*

<sup>b</sup>*School of Electrical Engineering, Korea University, Seoul, 02841, South Korea*

<sup>c</sup>*Center for Organic Photonics and Electronics Research (OPERA), Kyushu University, 744 Motoooka, Nishi, Fukuoka, 819-0395, Japan*

<sup>d</sup>*Department of Chemistry and Biochemistry, Kyushu University, 744 Motoooka, Nishi-ku, Fukuoka 819-0395, Japan*

\*Corresponding author.

*E-mail address: saeyounlee@dongguk.edu*

#### Contents:

|                                                |             |
|------------------------------------------------|-------------|
| <b>A. Instrument</b>                           | <b>S2</b>   |
| <b>B. NMR spectra</b>                          | <b>S3-4</b> |
| <b>C. TD-DFT calculations data</b>             | <b>S5</b>   |
| <b>D. Thermal and photophysical properties</b> | <b>S6-9</b> |
| <b>E. Determination of rate constants</b>      | <b>S9</b>   |

## A. Instrument

NMR spectra were recorded on an Avance III 500 spectrometer (Bruker). Chemical shifts of  $^1\text{H}$  NMR signals were quoted to tetramethylsilane ( $\delta = 0.00$ ) as an internal standards. Matrix-assisted laser desorption ionization time-of-flight (MALDI-TOF) mass spectra were collected on a Autoflex III spectrometer (Bruker Daltonics) using dithranol as the matrix. Elemental analyses were carried out with a Yanaco MT-5 CHN corder. The UV/vis absorption and PL spectra of organic films were measured with a UV-2550 (Shimadzu) and a FluoroMax-4 spectrofluorometer (Horiba Scientific), respectively. The photoluminescence quantum efficiency ( $\Phi_{\text{PL}}$ ) was measured using an absolute PL quantum yield measurement system (Hamamatsu Photonics C9920-02, PMA-11). Luminescence intensity and lifetime of organic films were measured with a Streak camera (Hamamatsu Photonics C4334). The organic films were excited by an  $\text{N}_2$  gas laser ( $\lambda = 337$  nm, pulse width = 500 ps, repetition rate 20 Hz) under a vacuum of  $< 4 \times 10^{-1}$  Pa. Samples were cooled down at 5 K with a cryostat (Iwatani Industrial Gases). The density-functional theory (DFT) computations were performed on the Gaussian 09 program package, using the B3LYP functional with the 6-31G(d,p) basis set. Angular-dependent PL spectra of 6 wt% emitter-doped PPT films (15 nm thick) were measured to determine the molecular orientation. The sample consisted of a glass substrate was attached to a fused silica half-cylinder prism with a refractive index-matching liquid and an excitation CW laser at the wavelength of 375 nm with a power less than 20 mW was irradiated onto the film. Through a cutoff filter, a polarizer, and a collimating lens, PL intensity in a transverse magnetic mode was detected by a monochromator (PMA-11, Hamamatsu Photonics). The PL intensities were acquired in each out-of-plane angle from  $0^\circ$  (vertical to the substrate surface) to  $90^\circ$  (horizontal to the substrate surface), with a step of  $1^\circ$  (C14234-11; Hamamatsu Photonics). The obtained PL intensity angle-dependent patterns were analyzed using a commercial software package (Setfos 3.4, Fluxim).

## B. NMR spectra

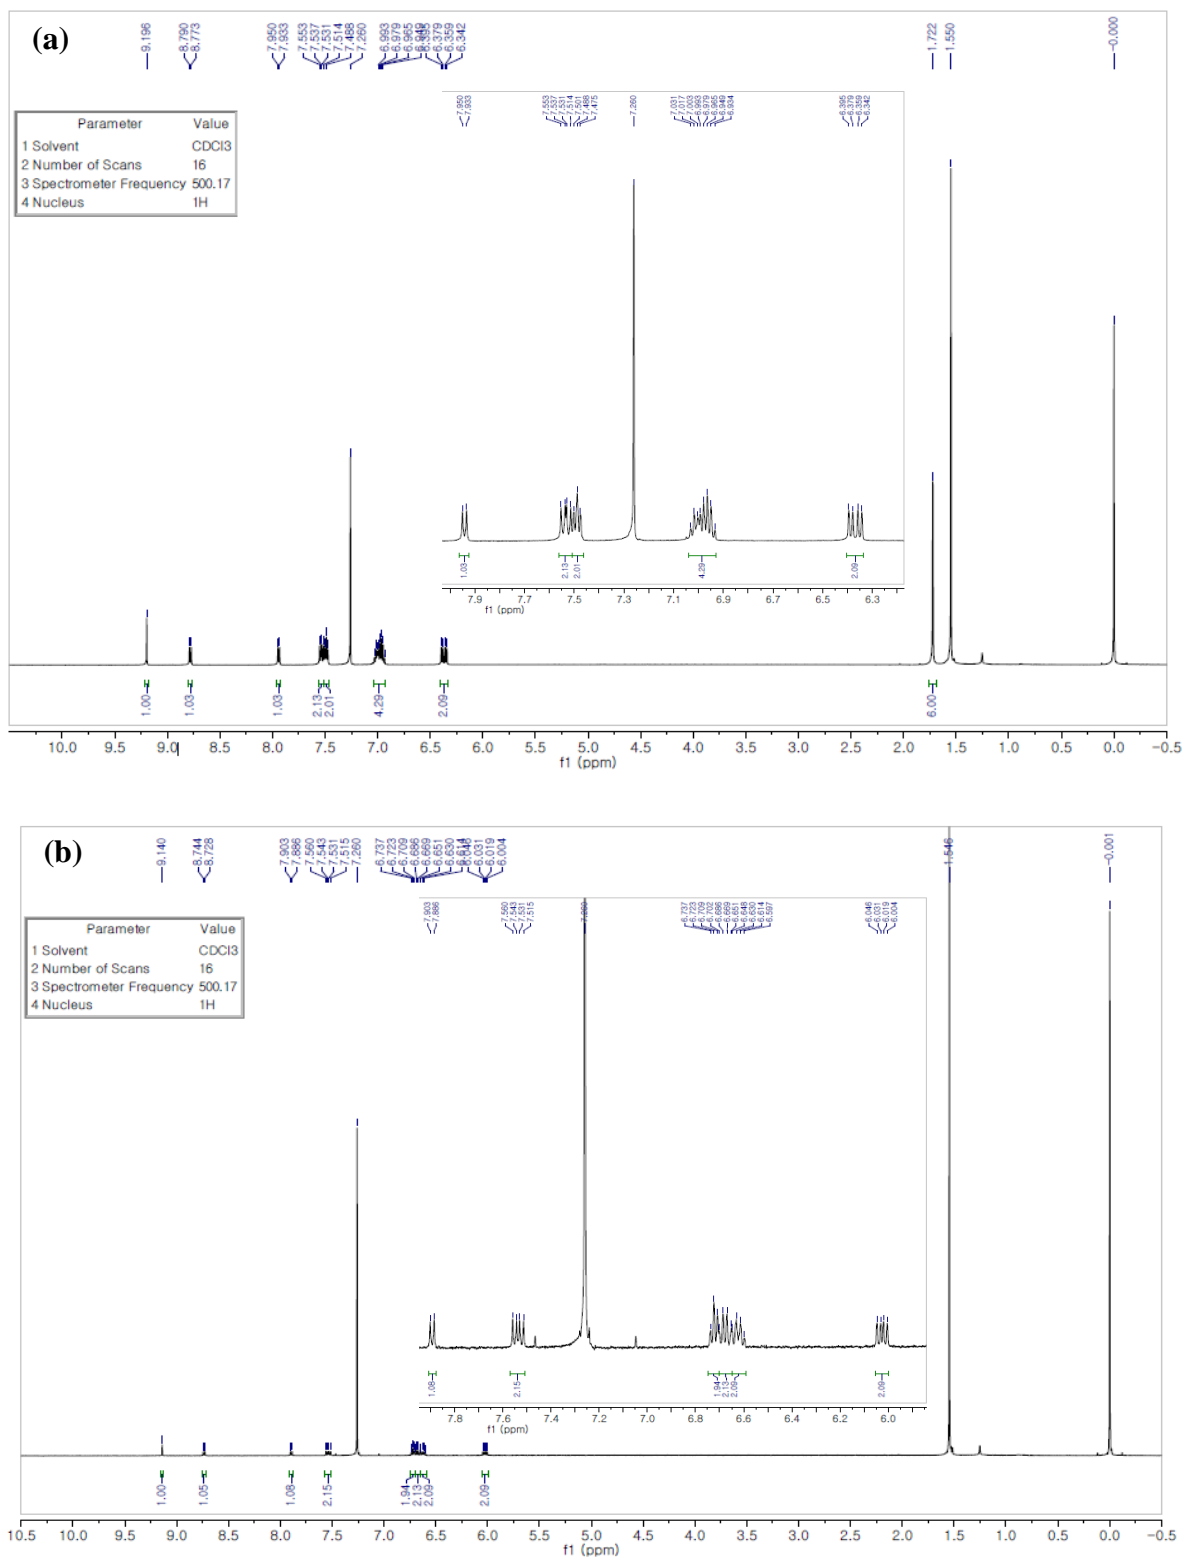

**Fig. S1.** <sup>1</sup>H NMR of (a) **AcPYM** and (b) **PxPYM**.

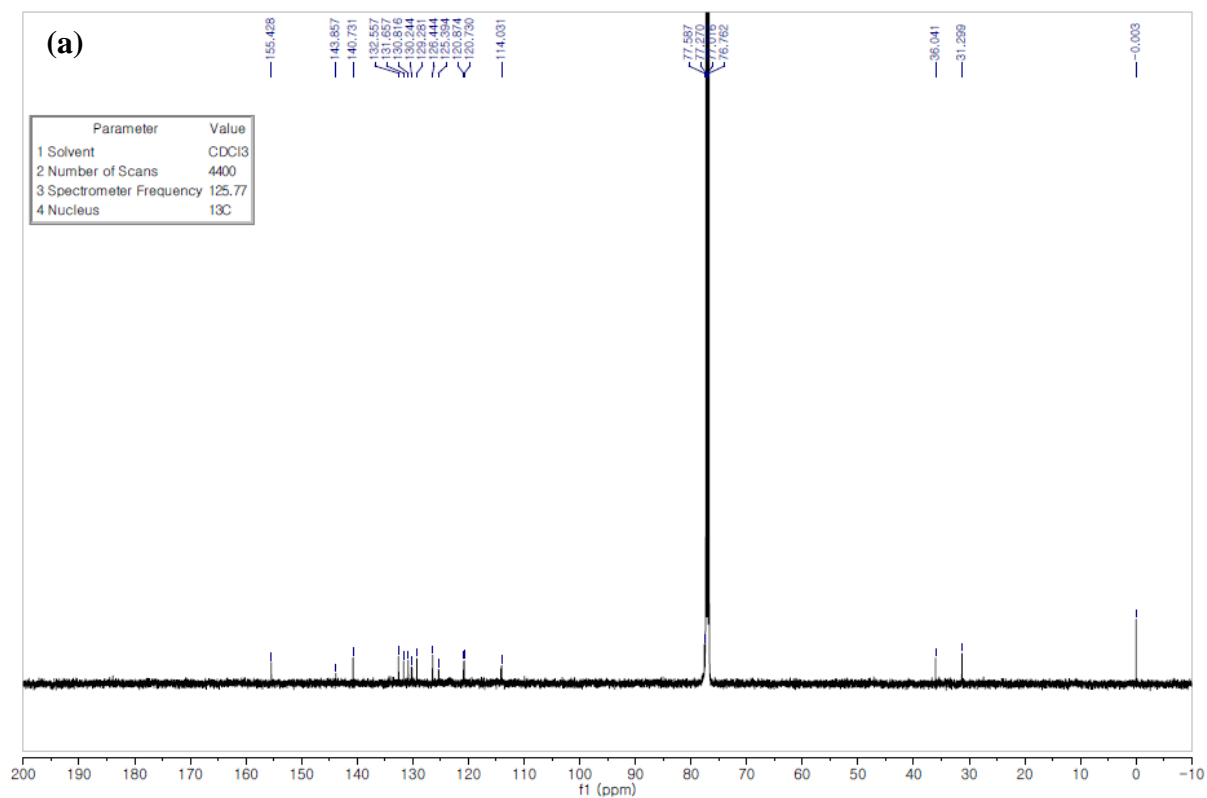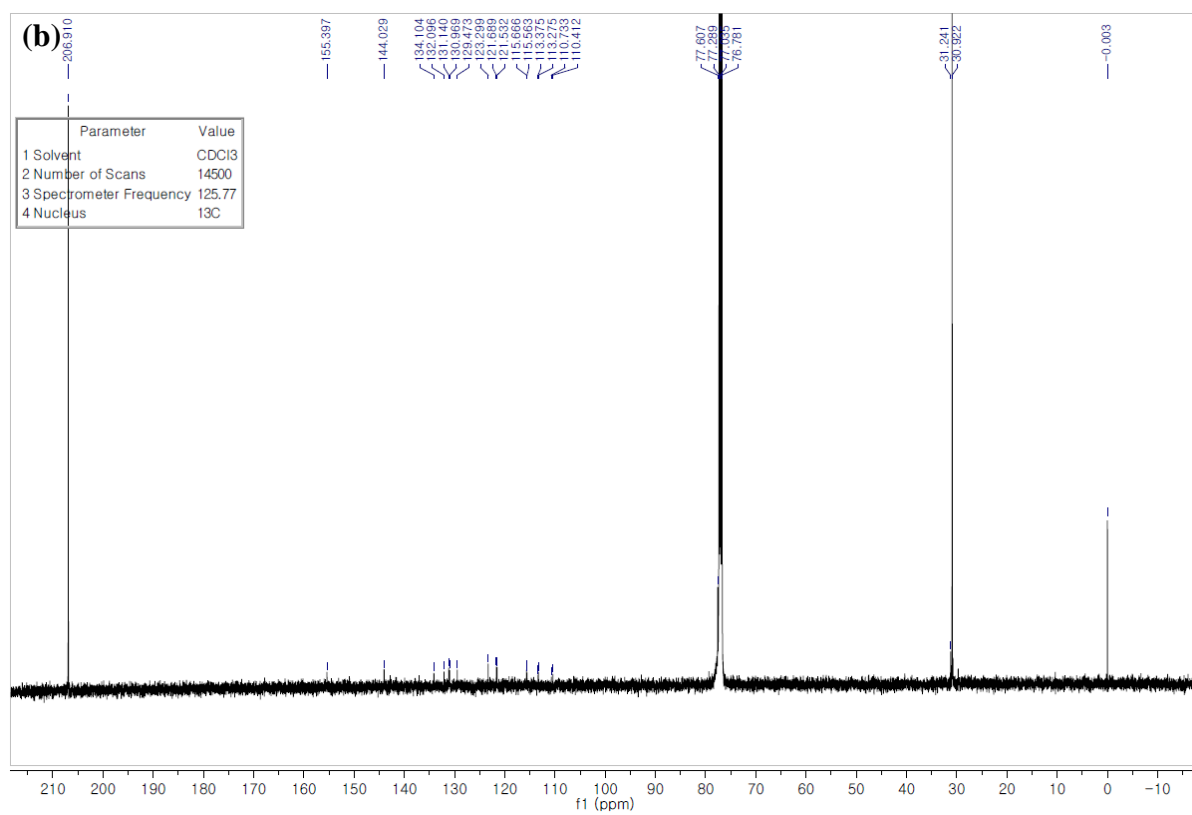

**Fig. S2.** <sup>13</sup>C NMR of (a) AcPYM and (b) PxPYM.

### C. TD-DFT calculations data

**Table S1.** Triplet and singlet excitation energies (vertical transition), oscillator strength ( $f$ ), and transition configurations of **AcPYM** and **PxPYM** calculated by TD-DFT at the B3LYP/6-31G(d,p).

| Emitter      | State          | $E$ [eV] | $f$    | Main configuration <sup>a)</sup> | $\Delta E_{ST}$ [eV] |       |
|--------------|----------------|----------|--------|----------------------------------|----------------------|-------|
| <b>AcPYM</b> | S <sub>1</sub> | 2.420    | 0.0000 | H→L                              | 0.6991               | 0.006 |
|              | S <sub>2</sub> | 2.632    | 0.0000 | H-1→L                            | 0.6957               |       |
|              |                |          |        | H-1→L+3                          | 0.1215               |       |
|              | T <sub>1</sub> | 2.414    | 0.0000 | H→L                              | 0.6986               |       |
|              | T <sub>2</sub> | 2.626    | 0.0000 | H-1→L                            | 0.6947               |       |
|              |                |          |        | H-1→L+3                          | 0.1252               |       |
| <b>PxPYM</b> | S <sub>1</sub> | 2.102    | 0.0002 | H→L                              | 0.6994               | 0.006 |
|              | S <sub>2</sub> | 2.311    | 0.0005 | H-1→L                            | 0.6963               |       |
|              |                |          |        | H-1→L+3                          | 0.1169               |       |
|              | T <sub>1</sub> | 2.096    | 0.0000 | H→L                              | 0.6988               |       |
|              | T <sub>2</sub> | 2.306    | 0.0000 | H-1→L                            | 0.6954               |       |
|              |                |          |        | H-1→L+3                          | 0.1213               |       |

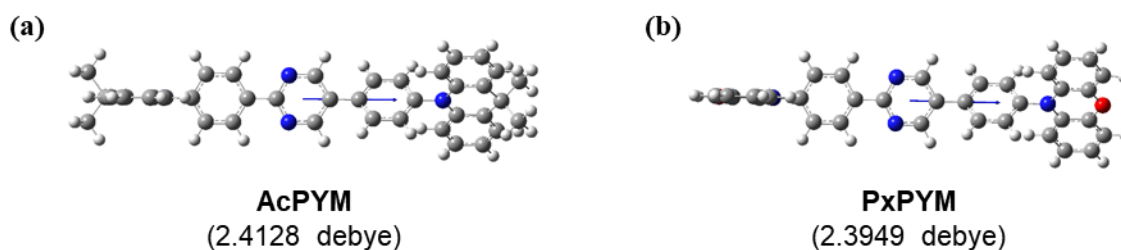

**Fig. S3.** The optimized molecular structure and transition dipole moments of (a) **AcPYM** and (b) **PxPYM**.

## D. Thermal and photophysical properties

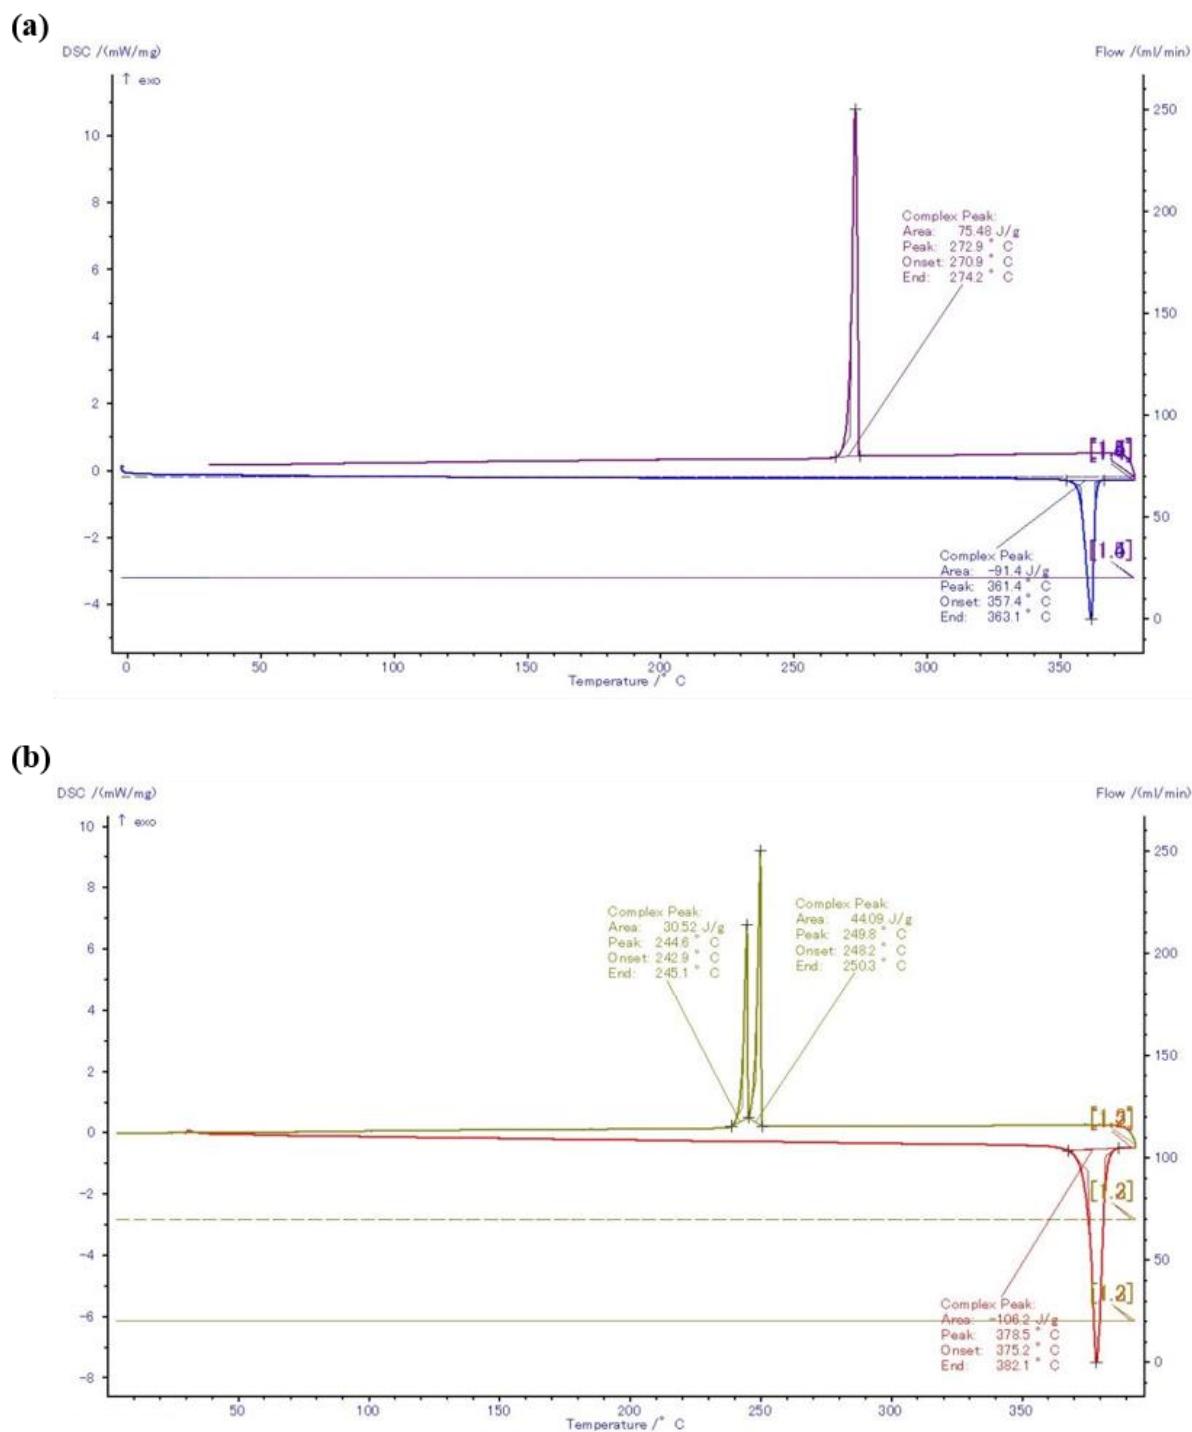

**Fig. S4.** DSC profiles of (a) AcPYM and (b) PxBYM.

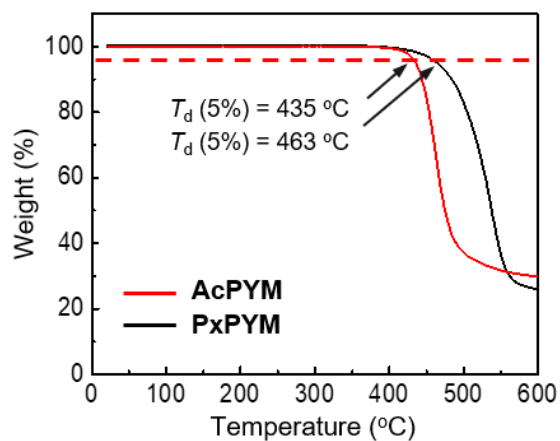

**Fig. S5.** TGA profiles of **AcPYM** (red) and **PxPYM** (black).

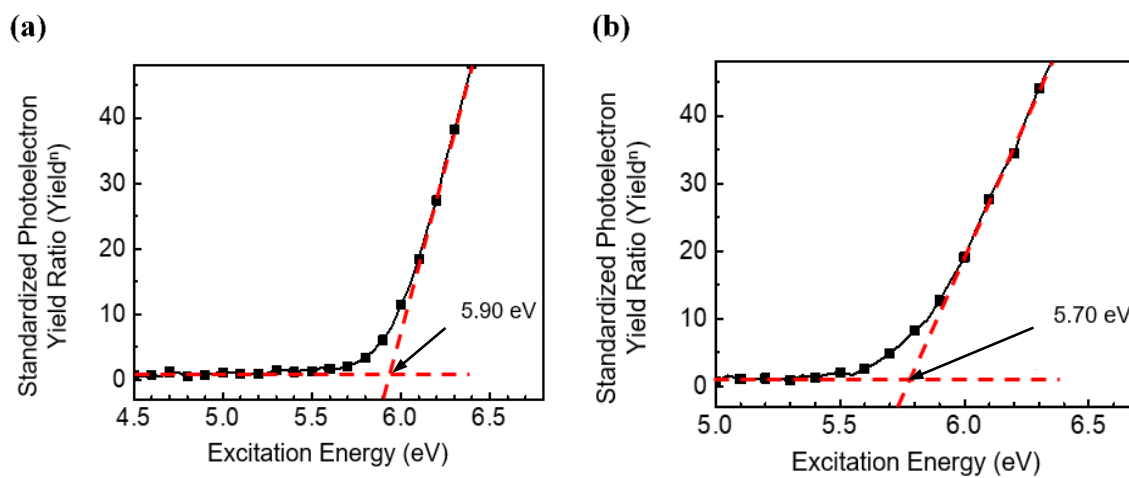

**Fig. S6.** Photoelectron yield spectra of (a) **AcPYM** and (b) **PxPYM**.

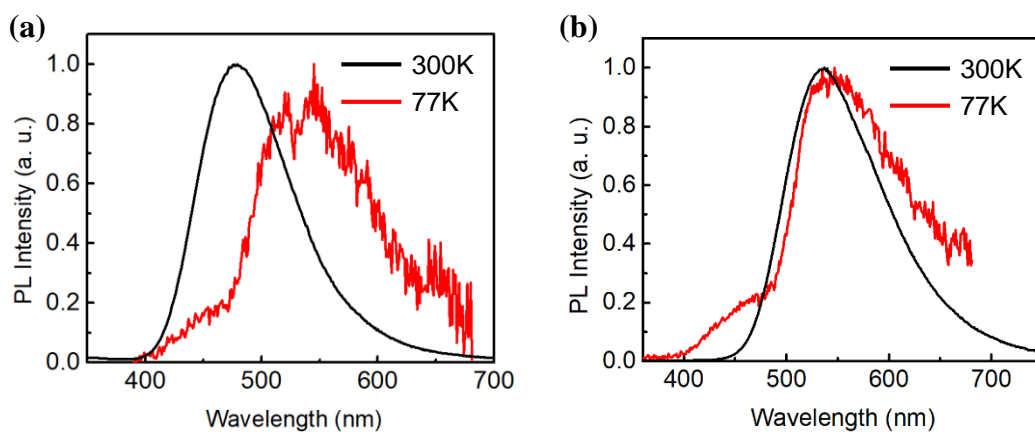

**Fig. S7.** PL and spectra of prompt fluorescence at 300 K (black) and phosphorescence at 77 K (red) for (a) **AcPYM** and (b) **PxPYM**.

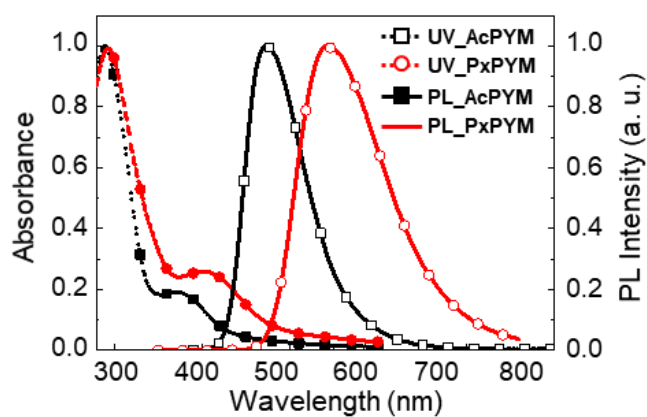

**Fig. S8.** UV-Vis and PL spectra of (a) **AcPYM** and (b) **PxPYM** neat film.



**Table S2.** Photophysical properties of **AcPYM** and **PxPYM** in solution<sup>a)</sup> and neat film.

| Emitter      | $\lambda_{abs}$ [nm] |      | $\lambda_{PL}$ [nm] |      | $\Phi_{PL}$ [%] |                |      |                |
|--------------|----------------------|------|---------------------|------|-----------------|----------------|------|----------------|
|              | solution             | neat | solution            | neat | solution        |                | neat |                |
|              |                      |      |                     |      | air             | N <sub>2</sub> | air  | N <sub>2</sub> |
| <b>AcPYM</b> | 375                  | 374  | 477                 | 474  | 31.0            | 44.9           | 33.0 | 34.9           |
| <b>PxPYM</b> | 394                  | 403  | 532                 | 540  | 32.5            | 64.6           | 50.5 | 54.0           |

<sup>a)</sup> in toluene,  $10^{-4}$  M

### E. Determination of rate constants

**Table S3.** Rate constants and quantum efficiencies of **AcPYM** and **PxPYM**<sup>a)</sup>.

| Emitter      | $k_r^S$<br>[s <sup>-1</sup> ] <sup>b)</sup> | $k_d$<br>[s <sup>-1</sup> ] <sup>c)</sup> | $k_{ISC}$<br>[s <sup>-1</sup> ] <sup>d)</sup> | $k_{RISC}$<br>[s <sup>-1</sup> ] <sup>e)</sup> | $k_{nr}^T$<br>[s <sup>-1</sup> ] <sup>f)</sup> | $\Phi_{ISC}$<br>[%] <sup>g)</sup> | $\Phi_{RISC}$<br>[%] <sup>h)</sup> |
|--------------|---------------------------------------------|-------------------------------------------|-----------------------------------------------|------------------------------------------------|------------------------------------------------|-----------------------------------|------------------------------------|
| <b>AcPYM</b> | $2.2 \times 10^7$                           | $2.1 \times 10^3$                         | $3.0 \times 10^7$                             | $9.0 \times 10^2$                              | $1.7 \times 10^3$                              | 89.3                              | 11.9                               |
| <b>PxPYM</b> | $2.4 \times 10^7$                           | $3.5 \times 10^3$                         | $3.5 \times 10^7$                             | $5.3 \times 10^3$                              | $1.3 \times 10^3$                              | 63.3                              | 58.1                               |

<sup>a)</sup> Measured using 6 wt.% **AcPYM**:PPT and **PxPYM**:PPT co-deposited films. <sup>b)</sup> Radiative decay rate constant of S<sub>1</sub> state,  $k_r^S = \Phi_p/\tau_p$ . <sup>c)</sup> Radiative decay rate constant of delayed fluorescence,  $k_d = 1/\tau_d$ . <sup>d)</sup> Radiative decay rate constant of ISC,  $k_{ISC} = k_p - k_r^S - k_{nr}^S$ ,  $k_{nr}^S \approx 0$ . <sup>e)</sup> Radiative decay rate constant of RISC,  $k_{RISC} = (k_p \times k_d \times \Phi_d)/(k_{ISC} \times \Phi_p)$ . <sup>f)</sup> Non-radiative decay rate constant of T<sub>1</sub> state,  $k_{nr}^T = k_d - (\Phi_p \times k_{RISC})$ . <sup>g)</sup> Efficiency of ISC,  $\Phi_{ISC} = 1 - \Phi_p$ . <sup>h)</sup> Efficiency of RISC,  $\Phi_{RISC} = \Phi_d/\Phi_{ISC}$ .
